# Supplementary material for: Beyond the use of modifiers in selective alkyne hydrogenation: silver and gold nanocatalysts in flow mode for sustainable alkene production
Source: Royal Society of Chemistry journal article supplement (doi:10.1039/c4nr02777a), 2014-01-01
Supplement: c4nr02777a1.pdf [file c4nr02777a1.pdf]

## Electronic Supplementary Information (ESI)

### Beyond the Use of Modifiers in Selective Alkyne Hydrogenation: Silver and Gold Nanocatalysts in Flow Mode for Sustainable Alkene Production

Gianvito Vilé and Javier Pérez-Ramírez\*

Institute for Chemical and Bioengineering, Department of Chemistry and Applied Biosciences, ETH Zurich, Vladimir-Prelog-Weg 1, 8093 Zurich, Switzerland.

\* Corresponding author. E-mail: [jpr@chem.ethz.ch](mailto:jpr@chem.ethz.ch)

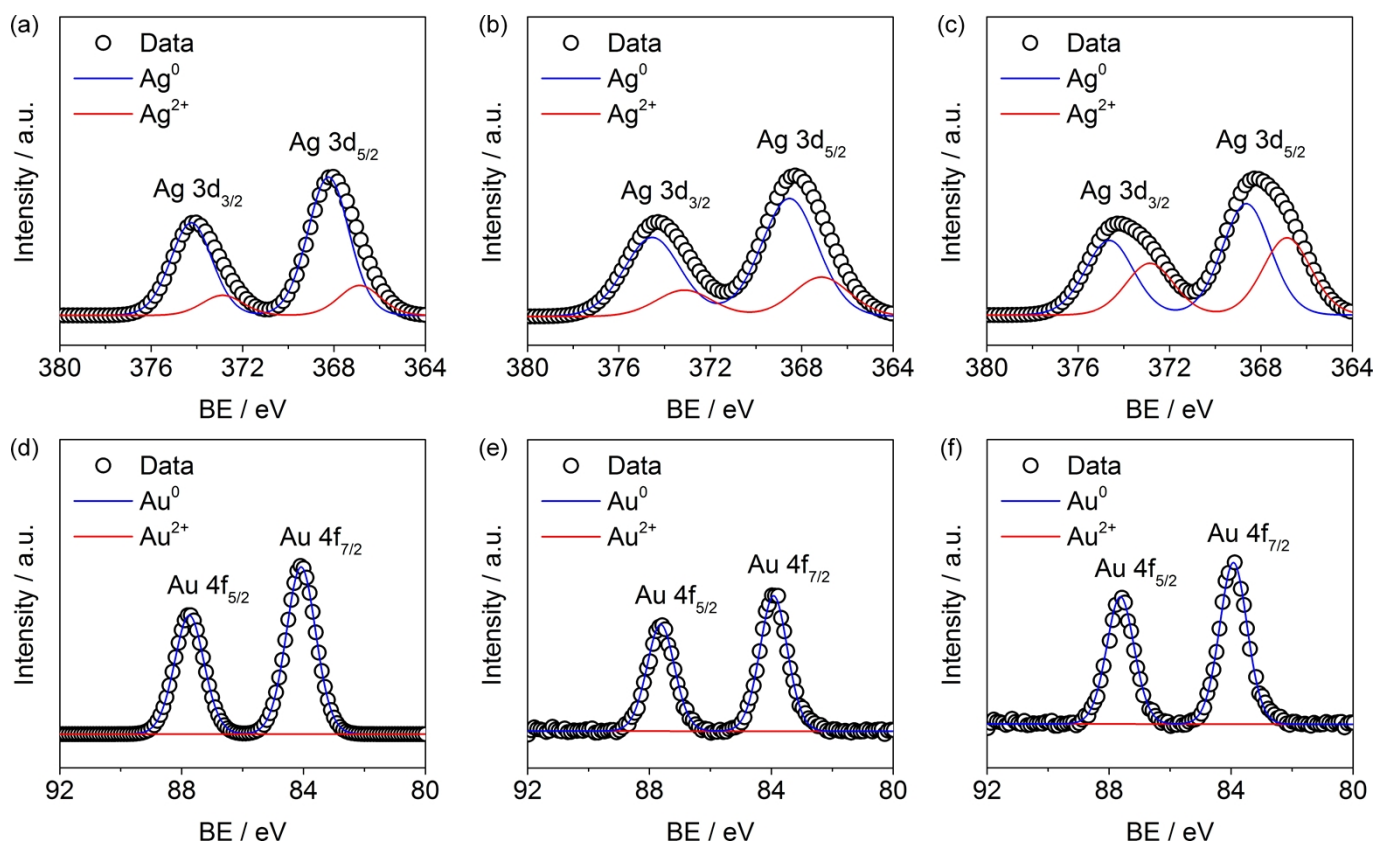

**Figure S1.** Ag 3d (top) and Au 4f (bottom) core level XPS spectra of catalysts **A** (a), **D** (b), **E** (c), **F** (d), **G** (e), and **K** (f) in Table 1.

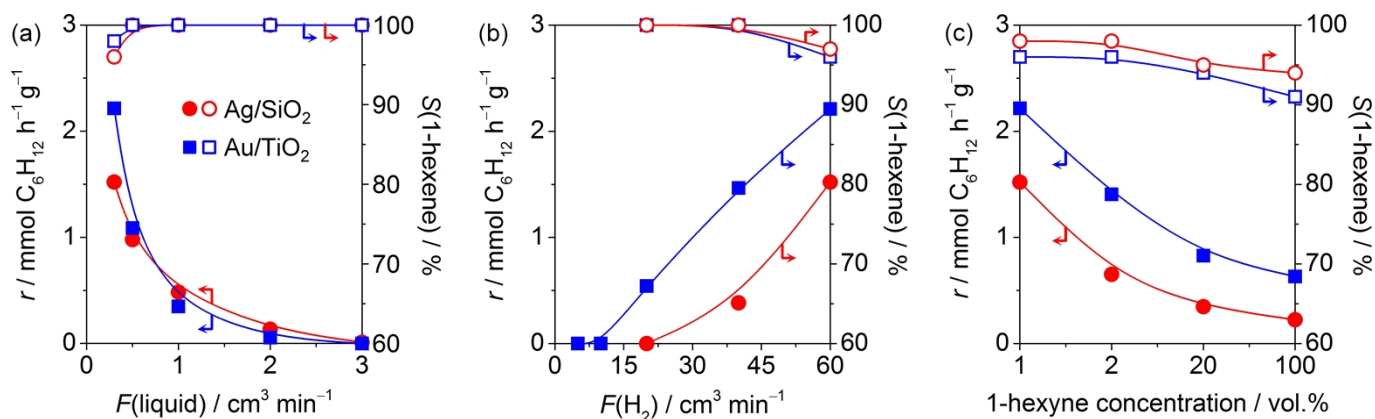

**Figure S2.** Hydrogenation of 1-hexyne as a function of the liquid (a) and hydrogen flow rate (b), and inlet concentration of 1-hexyne (c) over catalysts **A** and **G** in **Table 1**. The reactions were conducted at  $T = 373 \text{ K}$ ,  $P = 20 \text{ bar}$ ,  $F(\text{H}_2) = 60 \text{ cm}^3 \text{ min}^{-1}$ , and 1 vol.% 1-hexyne when assessing the influence of the liquid flow rate on the catalytic performance,  $F(\text{liquid}) = 0.3 \text{ cm}^3 \text{ min}^{-1}$  and 1 vol.% 1-hexyne when assessing the influence of the hydrogen flow rate, and  $F(\text{liquid}) = 0.3 \text{ cm}^3 \text{ min}^{-1}$  and  $F(\text{H}_2) = 60 \text{ cm}^3 \text{ min}^{-1}$  when assessing the influence of the inlet concentration of 1-hexyne

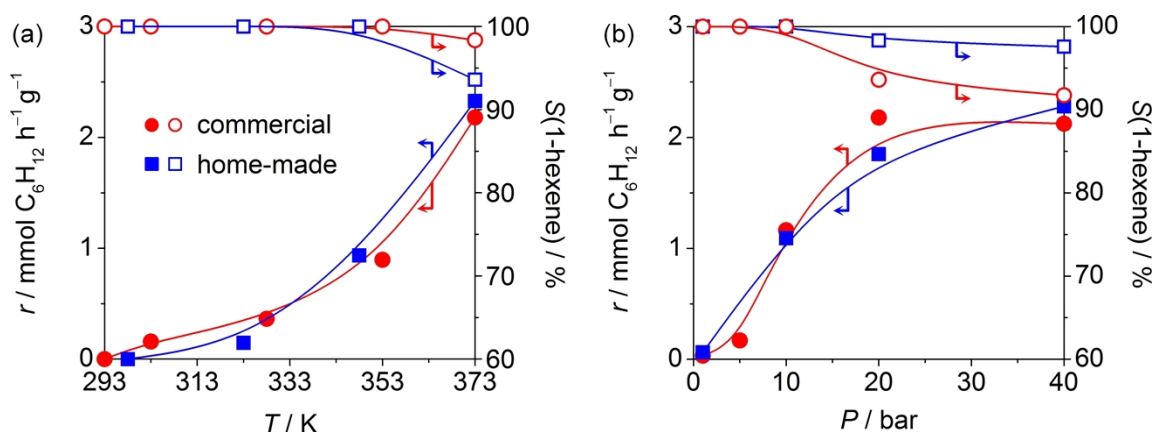

**Figure S3.** Hydrogenation of 1-hexyne as a function of temperature (a) and pressure (b) over the home-made Au/TiO<sub>2</sub> prepared by sol immobilisation and activated in N<sub>2</sub> flow at 623 K for 3 h (catalyst **G** in **Table 1**), and a commercial Au/TiO<sub>2</sub> sample (Strem Chemicals, ref: 79-0165). The reactions were conducted at  $F(\text{liquid}) = 0.3 \text{ cm}^3 \text{ min}^{-1}$  and  $F(\text{H}_2) = 60 \text{ cm}^3 \text{ min}^{-1}$ ; in particular, the influence of temperature was studied at  $P = 20 \text{ bar}$ , and the influence of pressure at  $T = 373 \text{ K}$ .
